# Supplementary material for: Selective anticancer copper(ii)-mixed ligand complexes: targeting of ROS and proteasomes
Source: Royal Society of Chemistry journal article supplement (doi:10.1039/c3mt00276d), 2014-01-01
Supplement: c3mt00276d1.pdf [file c3mt00276d1.pdf]

Supplementary Figures 1.1-1.5, 2.1-2.2, 3 and 4; Supplementary Table 1

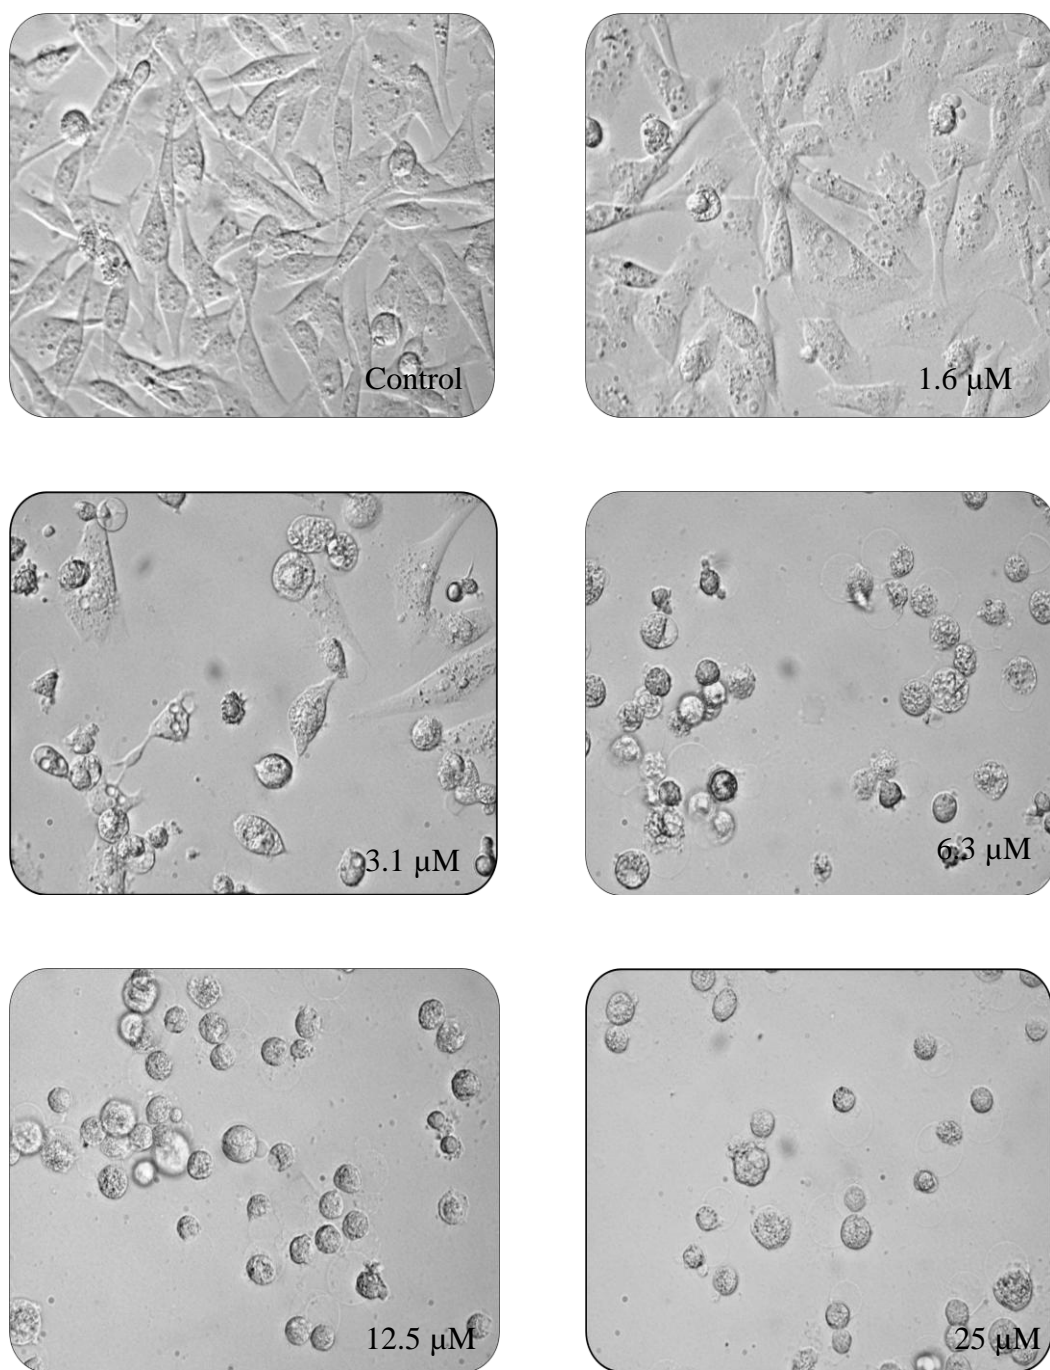

**Sup Fig. 1.1A** Morphological changes in MDA-MB-231 cells treated for 24 h with [Cu(phen)(gly)(H<sub>2</sub>O)]NO<sub>3</sub> 1 at different concentrations as compared to untreated cells. (Microscope magnification 400x). All pictures are typical of three independent experiments each performed under identical conditions.

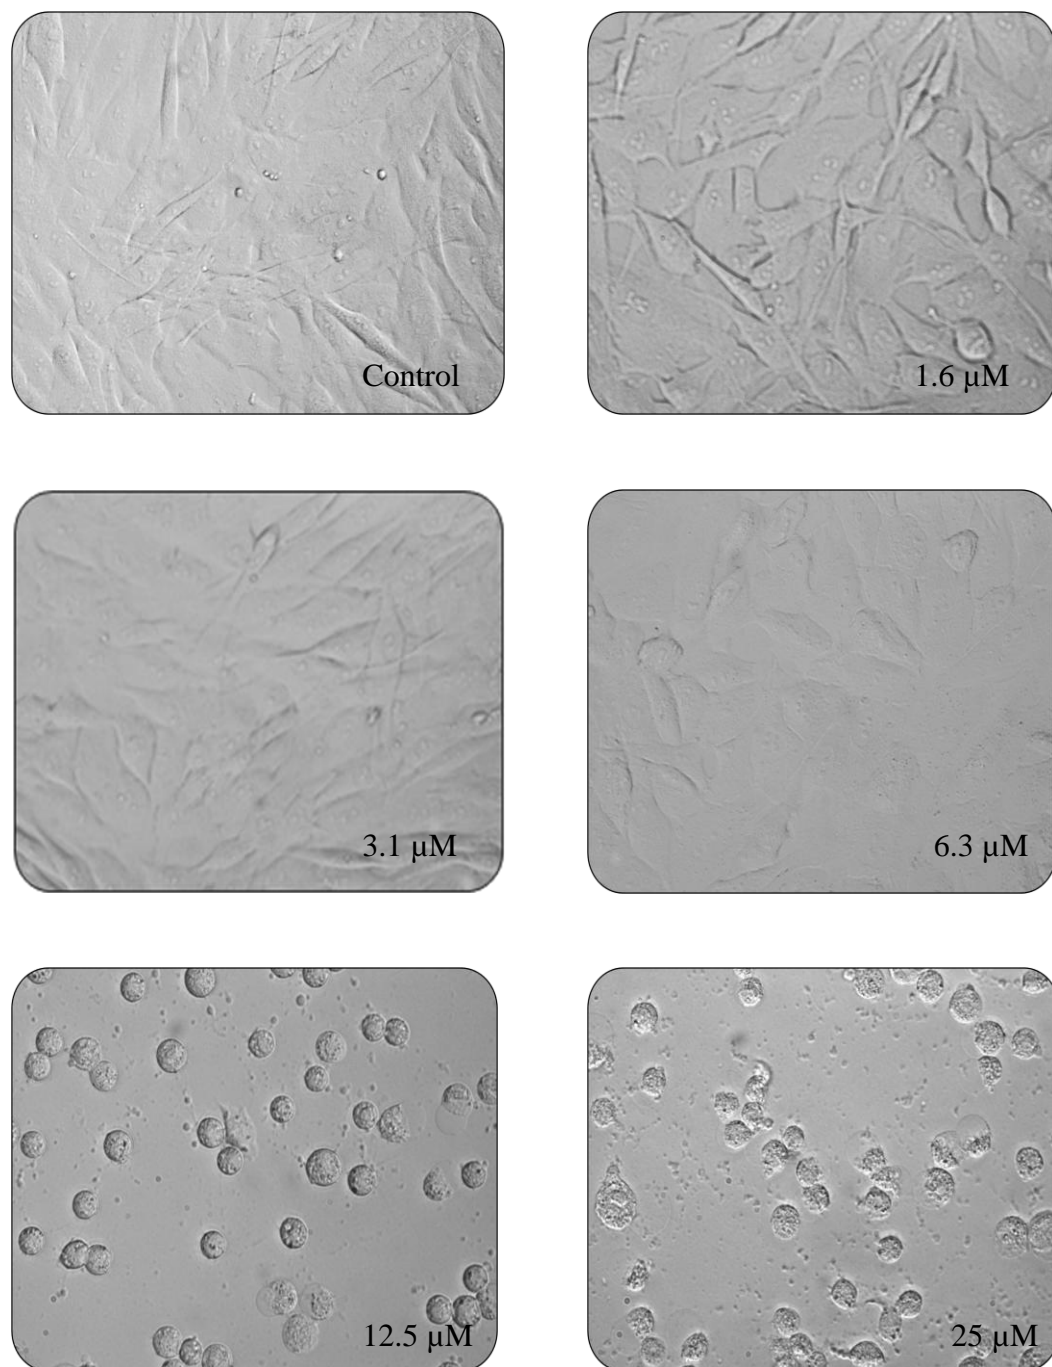

**Sup Fig. 1.1B** Morphological changes in MCF10A cells treated for 24 h with [Cu(phen)(gly)(H<sub>2</sub>O)]NO<sub>3</sub> 1 at different concentrations as compared to untreated cells. (Microscope magnification 400x). All pictures are typical of three independent experiments each performed under identical conditions.

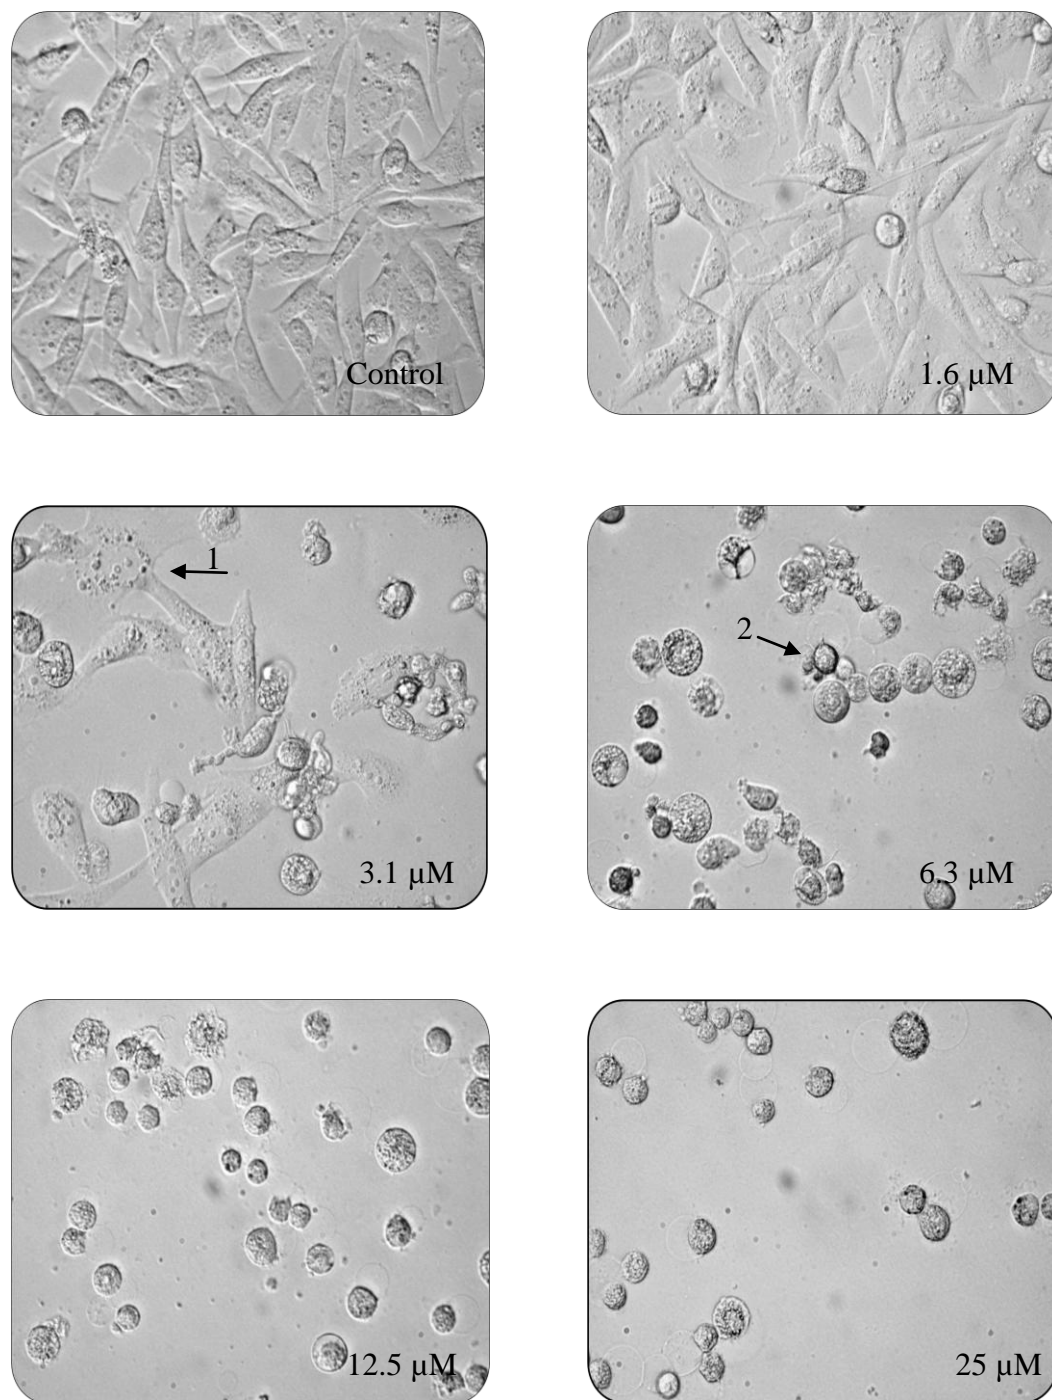

**Sup Fig. 1.2A** Morphological changes in MDA-MB-231 cells treated for 24 h with  $[\text{Cu}(\text{phen})(\text{DL-ala})(\text{H}_2\text{O})]\text{NO}_3$  **2** at different concentrations as compared to untreated cells. (Microscope magnification 400x). All pictures are typical of three independent experiments each performed under identical conditions. Arrow (1) condensation of chromatin, (2) membrane bleb.

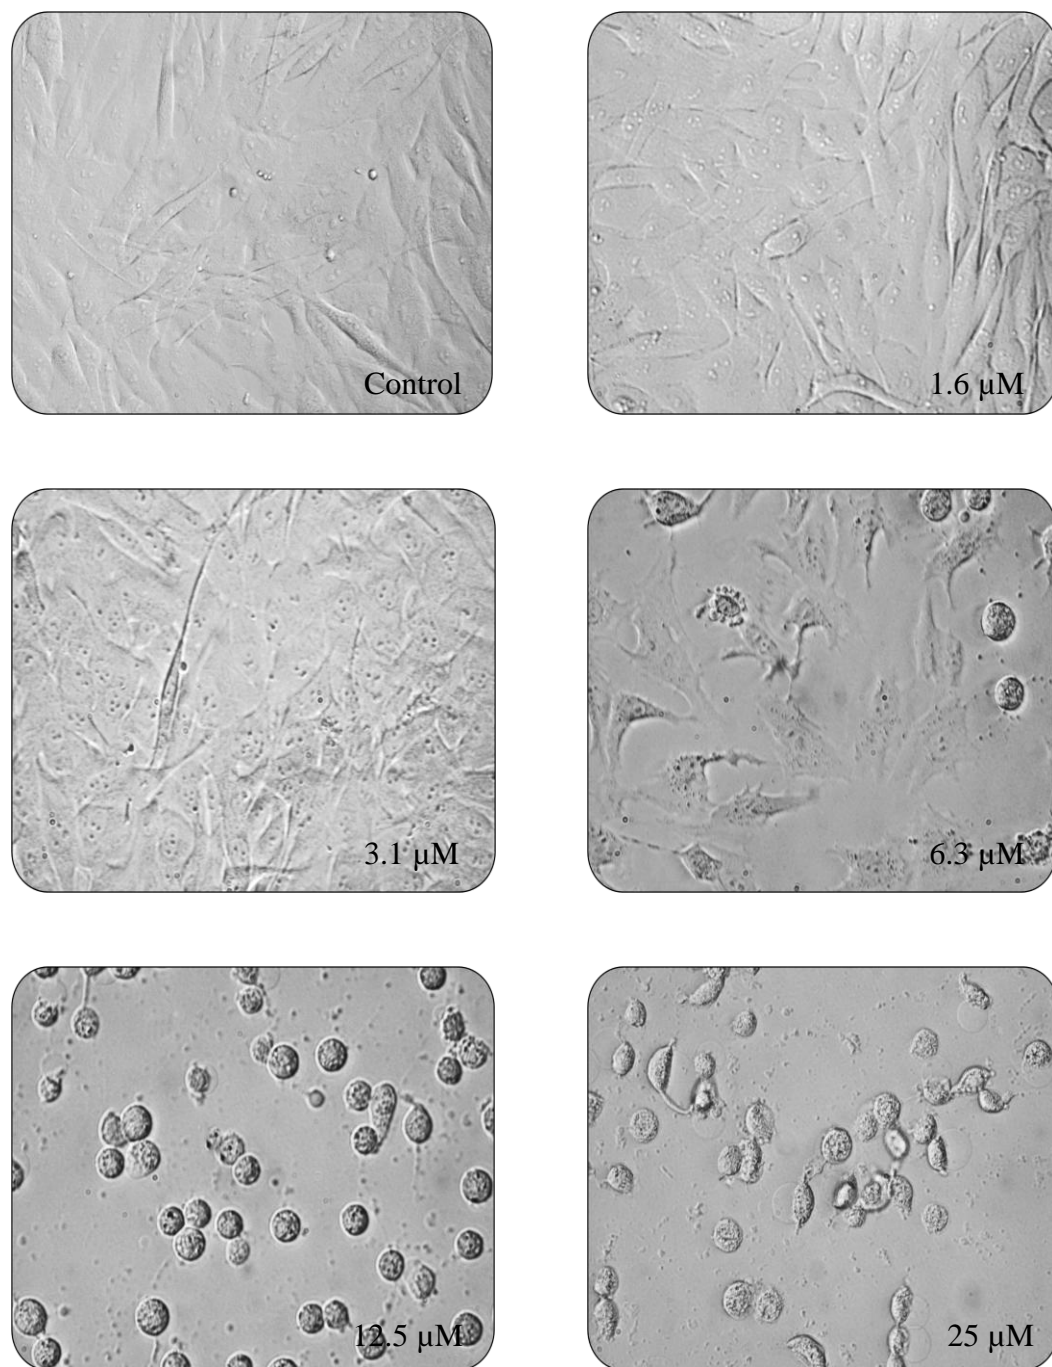

**Sup Fig. 1.2B** Morphological changes in MCF10A cells treated for 24 h with [Cu(phen)(DL-ala)(H<sub>2</sub>O)]NO<sub>3</sub> **2** at different concentrations as compared to untreated cells. (Microscope magnification 400x). All pictures are typical of three independent experiments each performed under identical conditions.

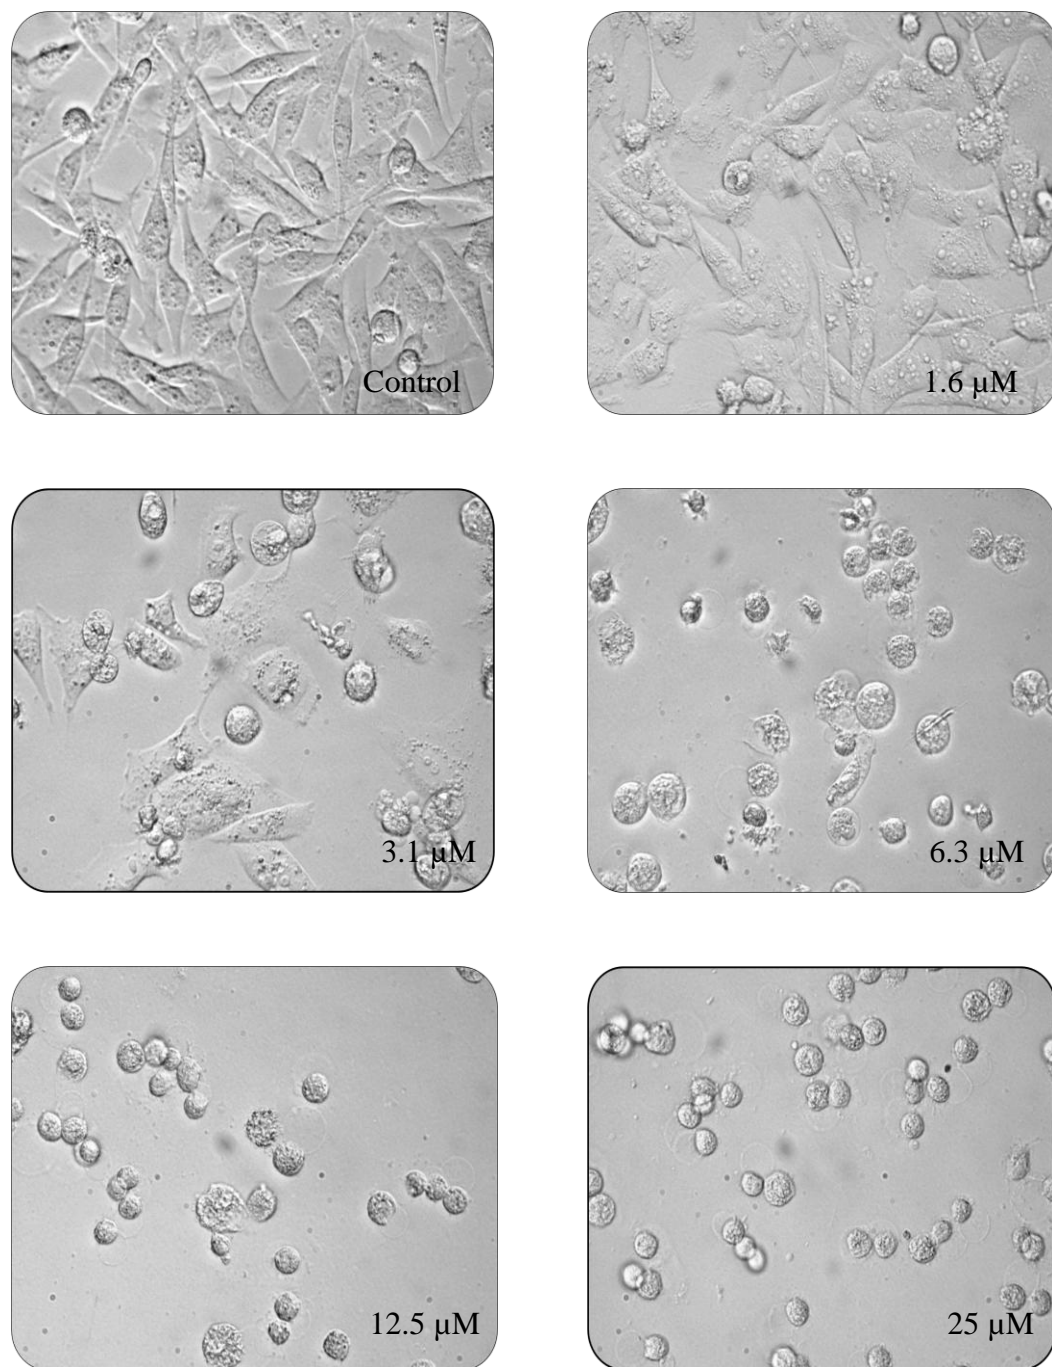

**Sup Fig. 1.3A** Morphological changes in MDA-MB-231 cells treated for 24 h with [Cu(phen)(sar)(H<sub>2</sub>O)]NO<sub>3</sub> **3** at different concentrations as compared to untreated cells. (Microscope magnification 400x). All pictures are typical of three independent experiments each performed under identical conditions.

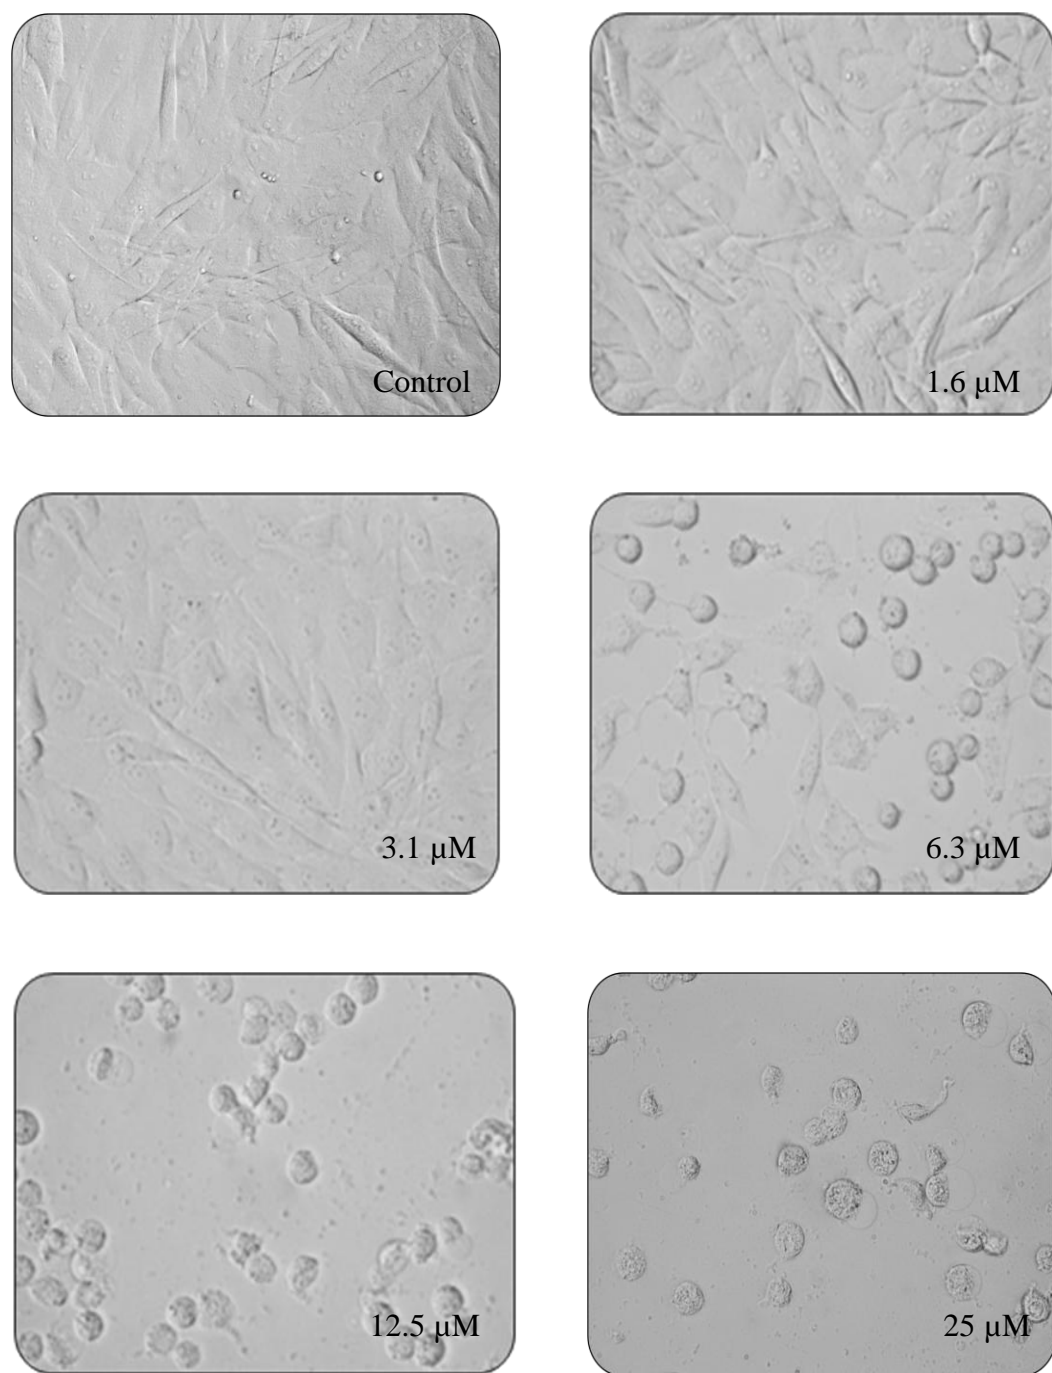

**Sup Fig. 1.3B** Morphological changes in MCF10A cells treated for 24 h with [Cu(phen)(sar)(H<sub>2</sub>O)]NO<sub>3</sub> **3** at different concentrations as compared to untreated cells. (Microscope magnification 400x). All pictures are typical of three independent experiments each performed under identical conditions.

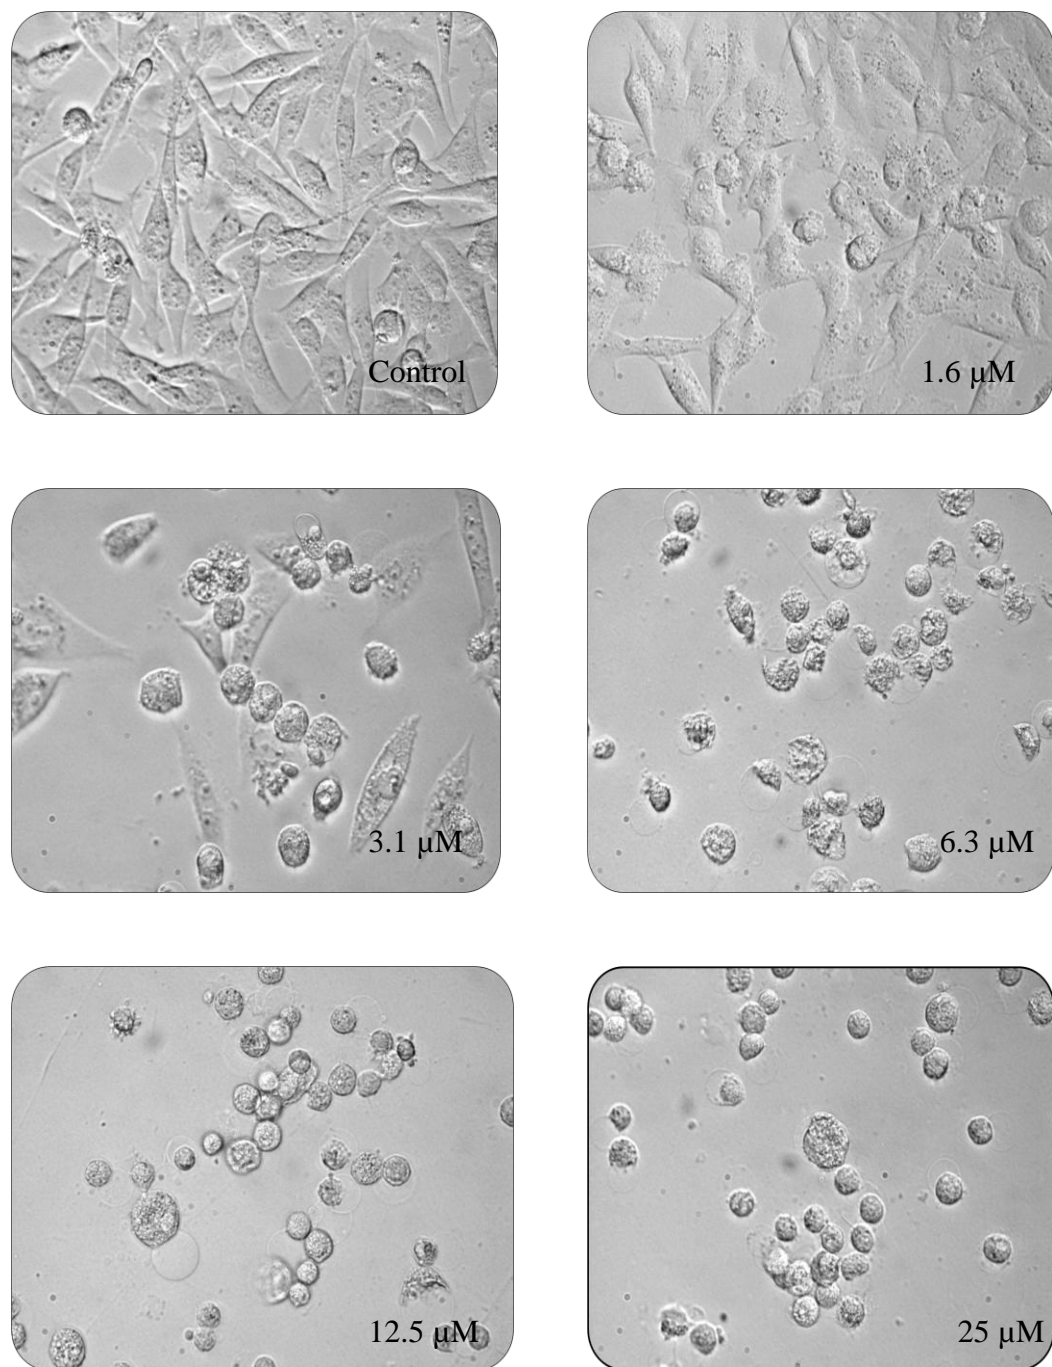

**Sup Fig. 1.4A** Morphological changes in MDA-MB-231 cells treated for 24 h with [Cu(phen)(C-dMg)(H<sub>2</sub>O)]NO<sub>3</sub> **4** at different concentrations as compared to untreated cells. (Microscope magnification 400x). All pictures are typical of three independent experiments each performed under identical conditions.

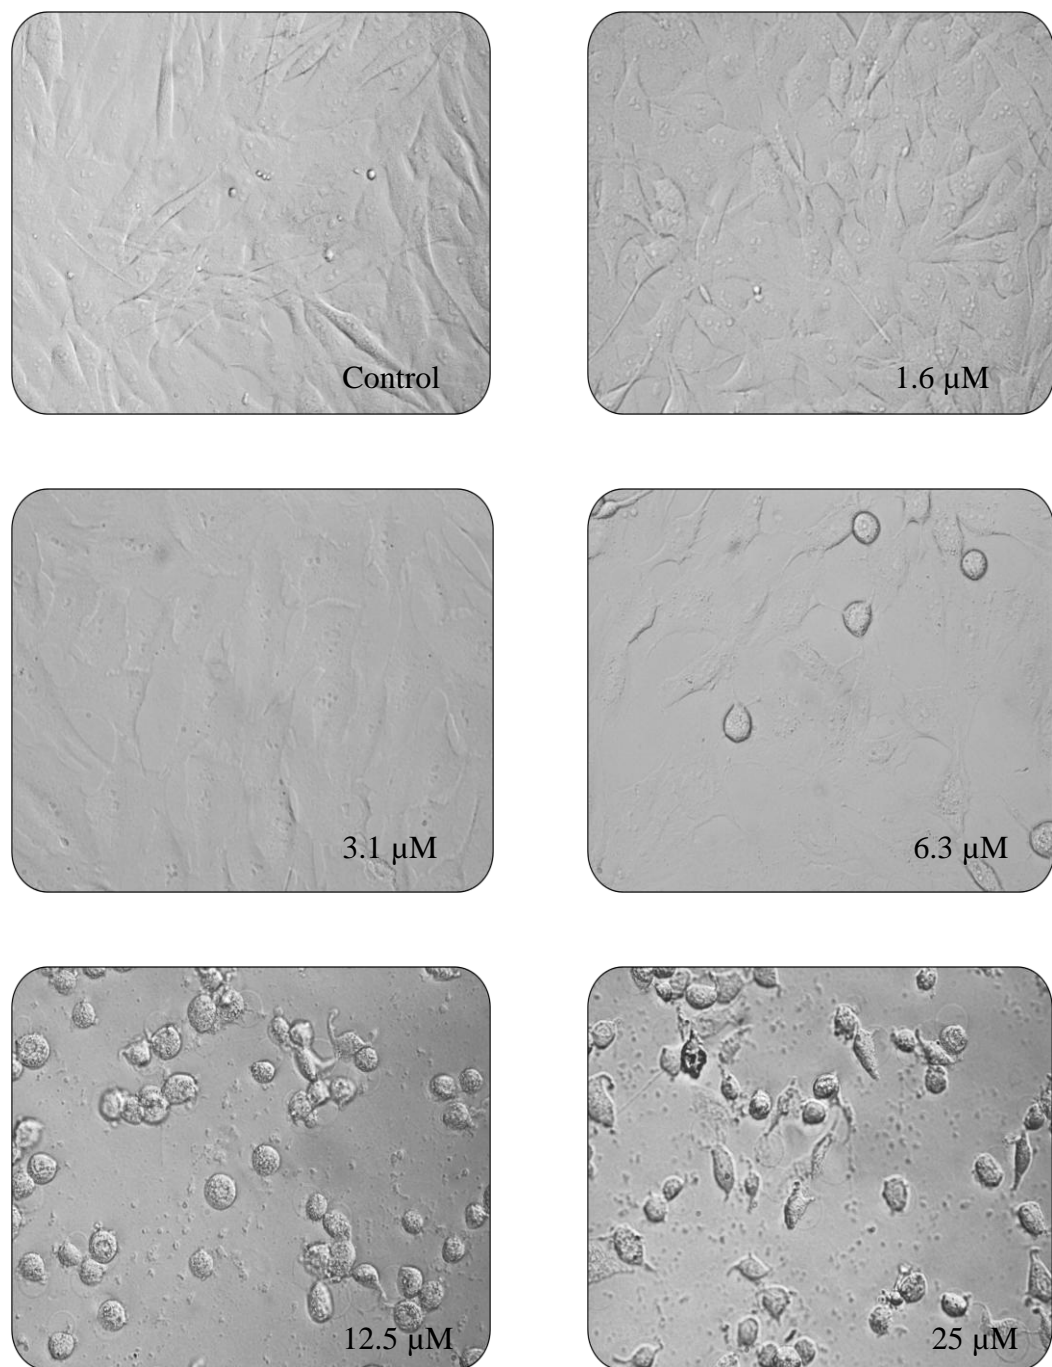

**Sup Fig. 1.4B** Morphological changes in MCF10A cells treated for 24 h with [Cu(phen)(C-dMg)(H<sub>2</sub>O)]NO<sub>3</sub> 4 at different concentrations as compared to untreated cells. (Microscope magnification 400x). All pictures are typical of three independent experiments each performed under identical conditions.

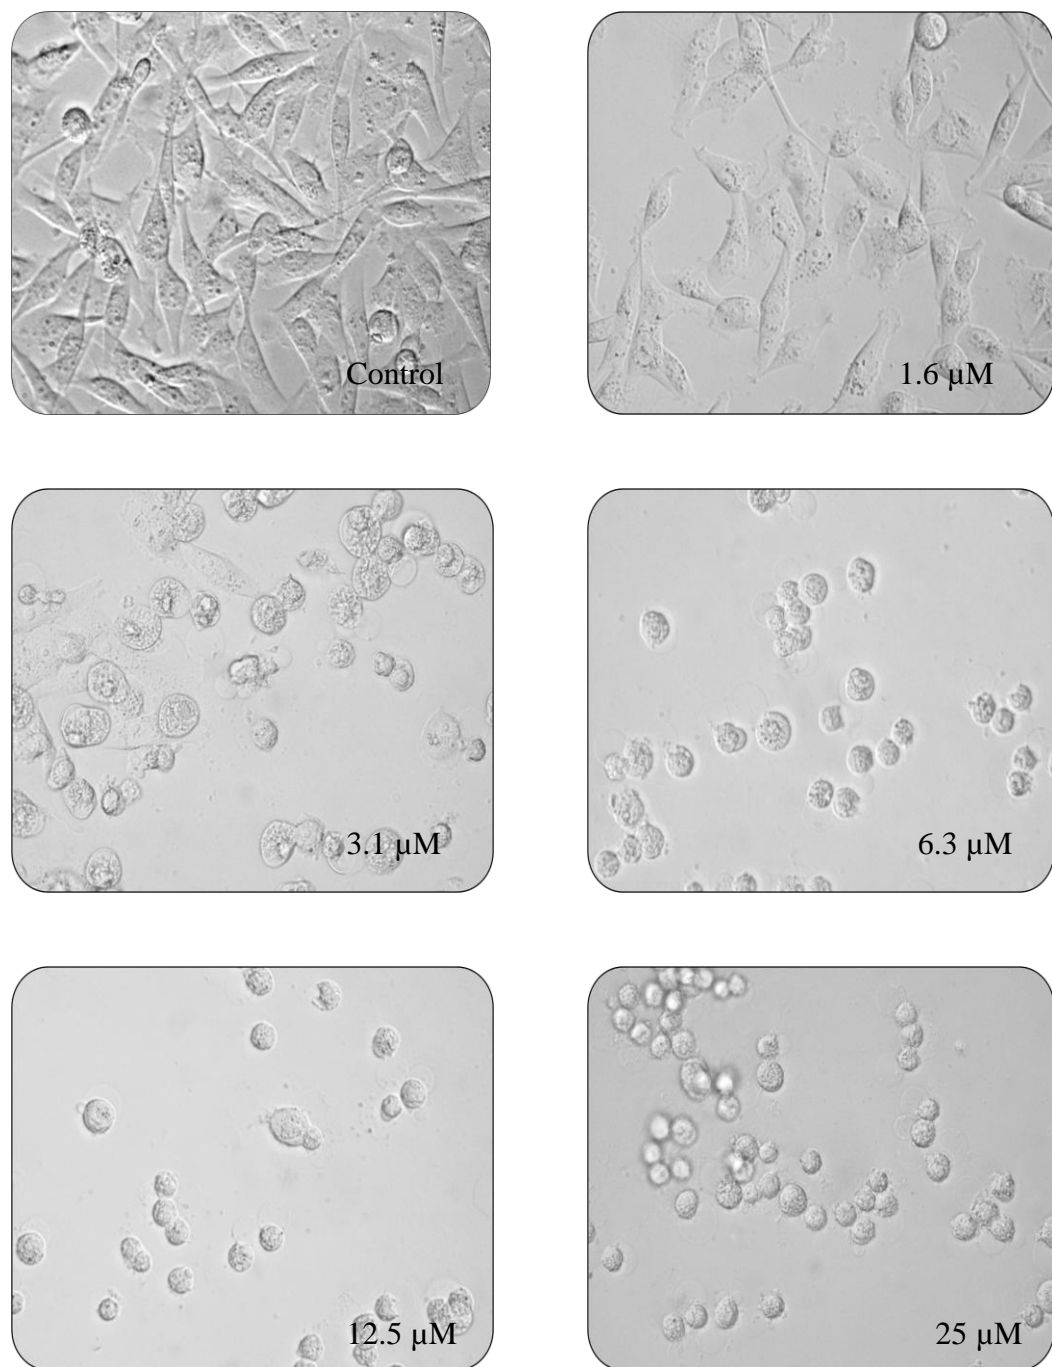

**Sup Fig. 1.5A** Morphological changes in MDA-MB-231 cells treated for 24 h with [Cu(8OHQ)<sub>2</sub>] at different concentrations as compared to untreated cells. (Microscope magnification 400x). All pictures are typical of three independent experiments each performed under identical conditions.

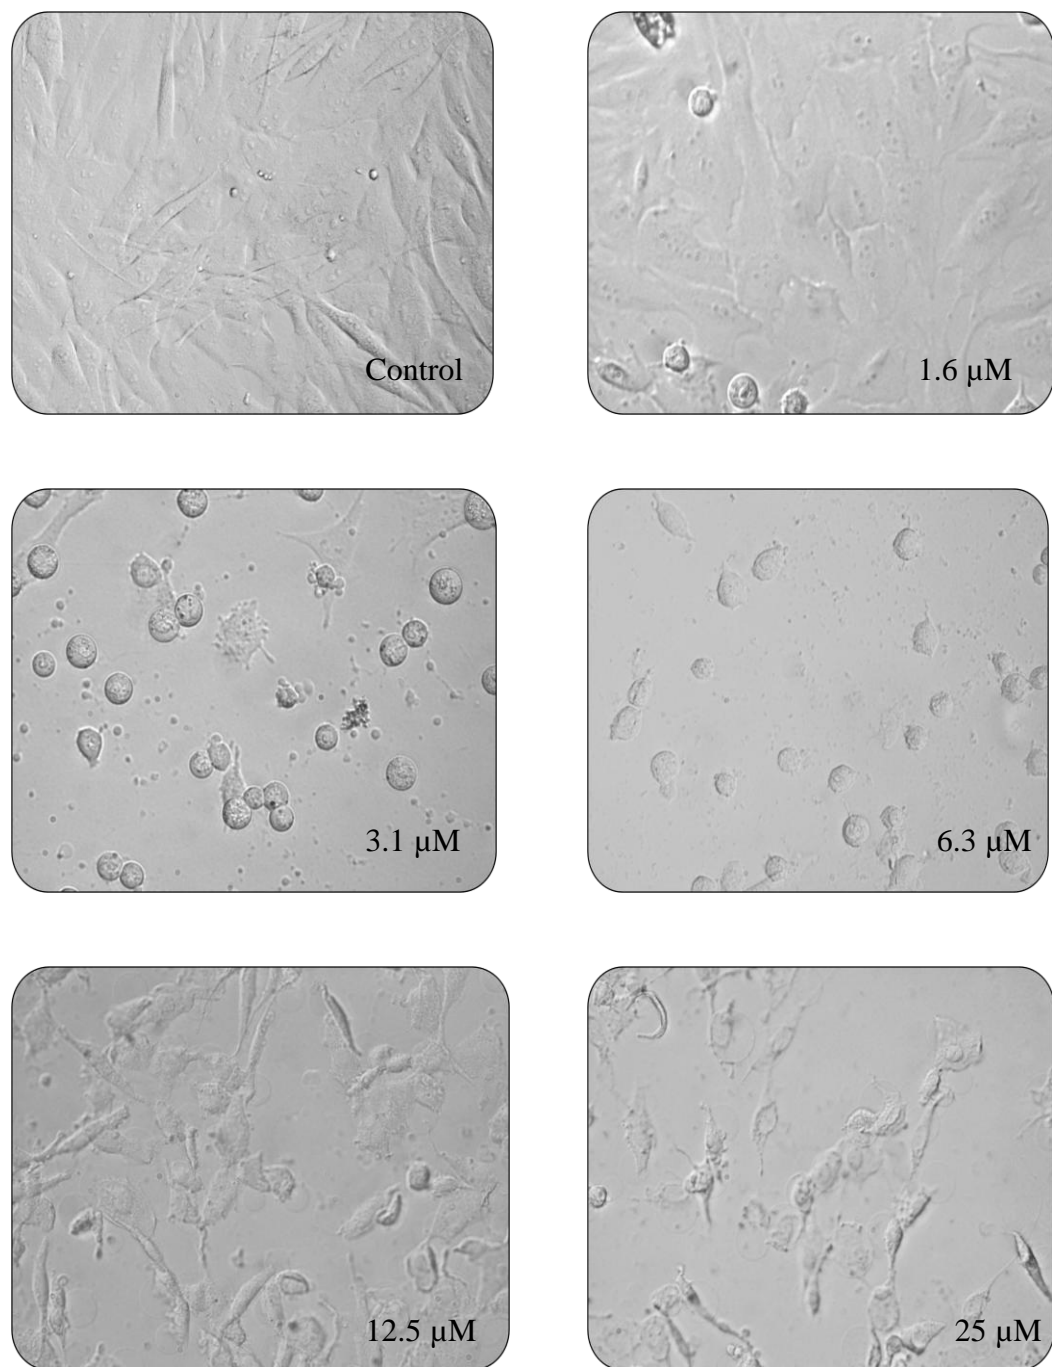

**Sup Fig. 1.5B** Morphological changes in MCF10A cells treated for 24 h with [Cu(8OHQ)<sub>2</sub>] at different concentrations as compared to untreated cells. (Microscope magnification 400x). All pictures are typical of three independent experiments each performed under identical conditions.

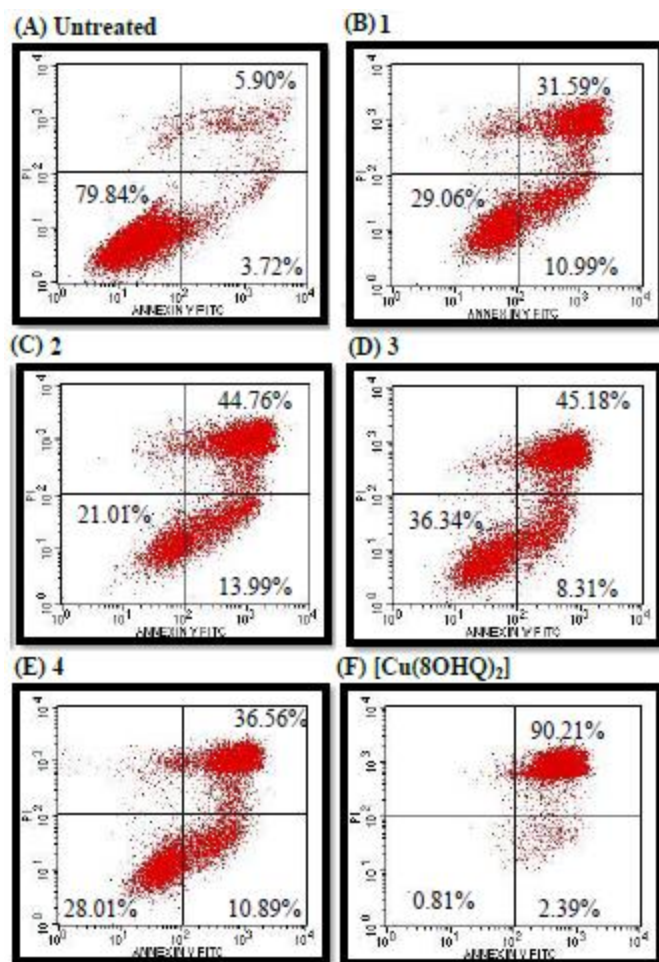

**Sup Fig. 2.1.** A comparison between untreated and treated MDA-MB-231 cells in expression of apoptosis after incubation with 5  $\mu$ M copper(II) complexes at 24 h by flow cytometry analysis. Percentage of total cells is shown for each quadrant. Results are representative of three independent experiments.

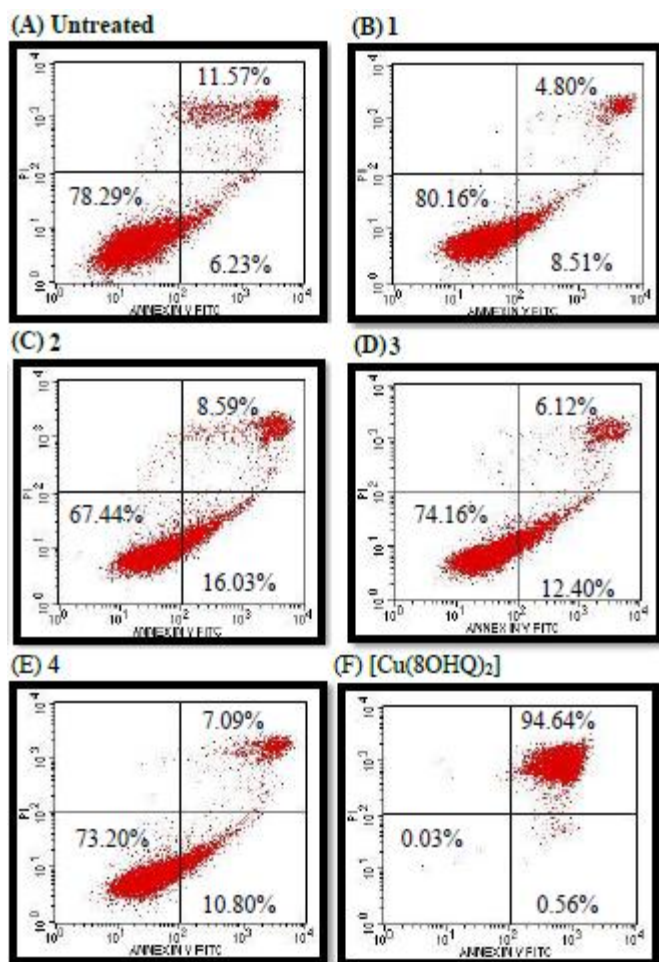

**Sup. Fig. 2.2** A comparison between untreated and treated MCF10A cells in expression of apoptosis after incubation with 5  $\mu$ M copper(II) complexes at 24 h by flow cytometry analysis. Percentage of total cells is shown for each quadrant. Results are representative of three independent experiments.

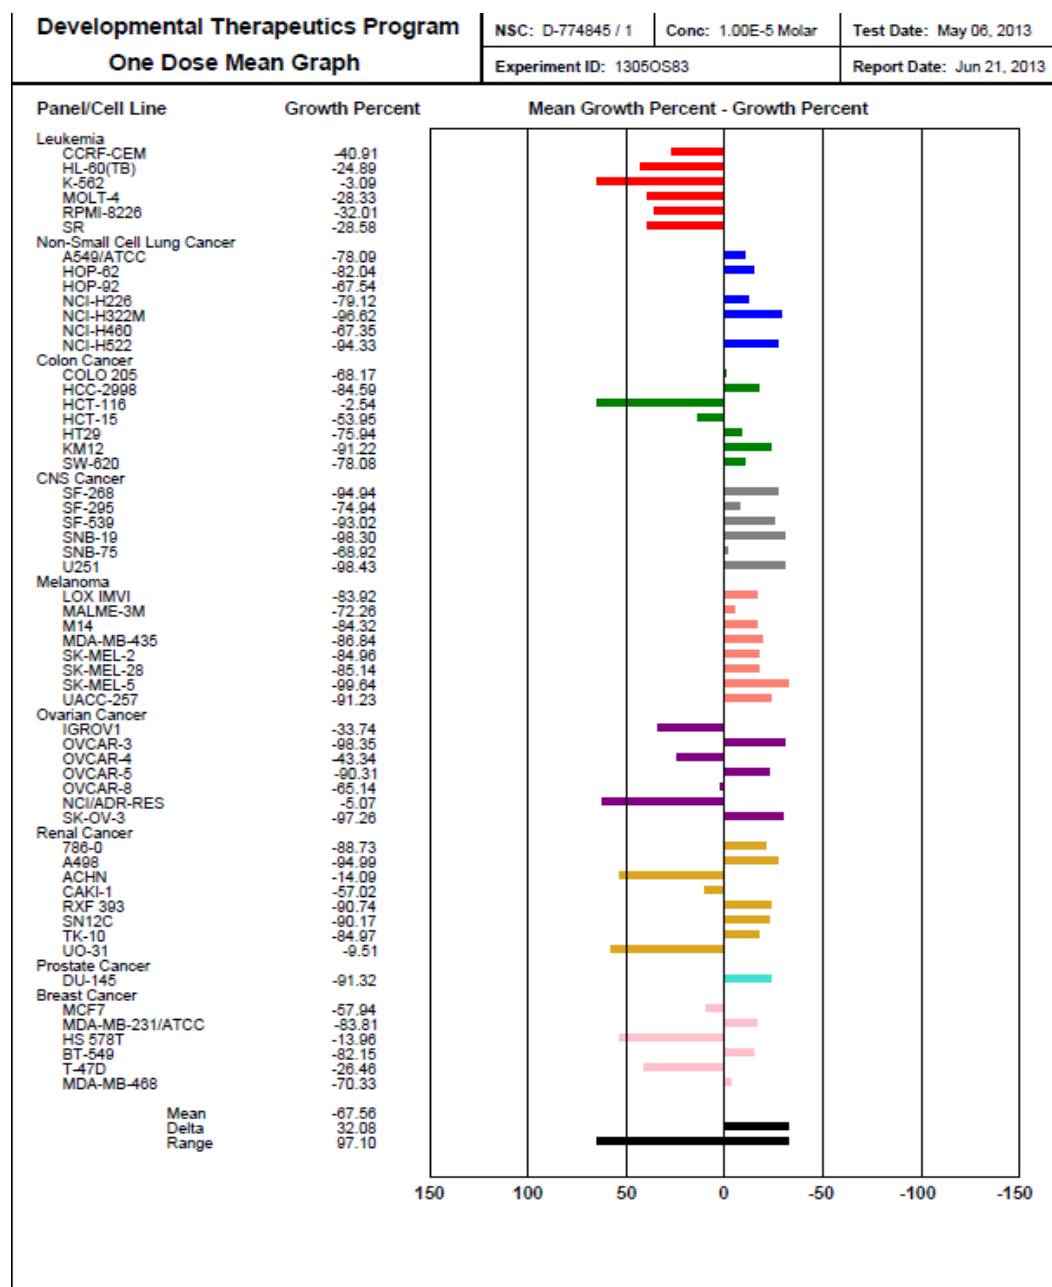

**Sup. Fig. 3** One-dose data in the National Cancer Institute anticancer screen showing a mean graph of the percent growth of cancer cells treated with of 10  $\mu$ M of **4** for 24 h. The number reported for the One-dose assay is growth relative to the no-drug control, and relative to the time zero number of cells. This allows detection of both growth inhibition (values between 0 and 100) and lethality (values less than 0). For example, a value of 100 means no growth inhibition. A value of 40 would mean 60% growth inhibition. A value of 0 means no net growth over the course of the experiment. A value of -40 would mean 40% lethality. A value of -100 means all cells are dead.

# One Dose Data Graph for NSC 119875 DTP OneDose/Syn/60 Cell Line

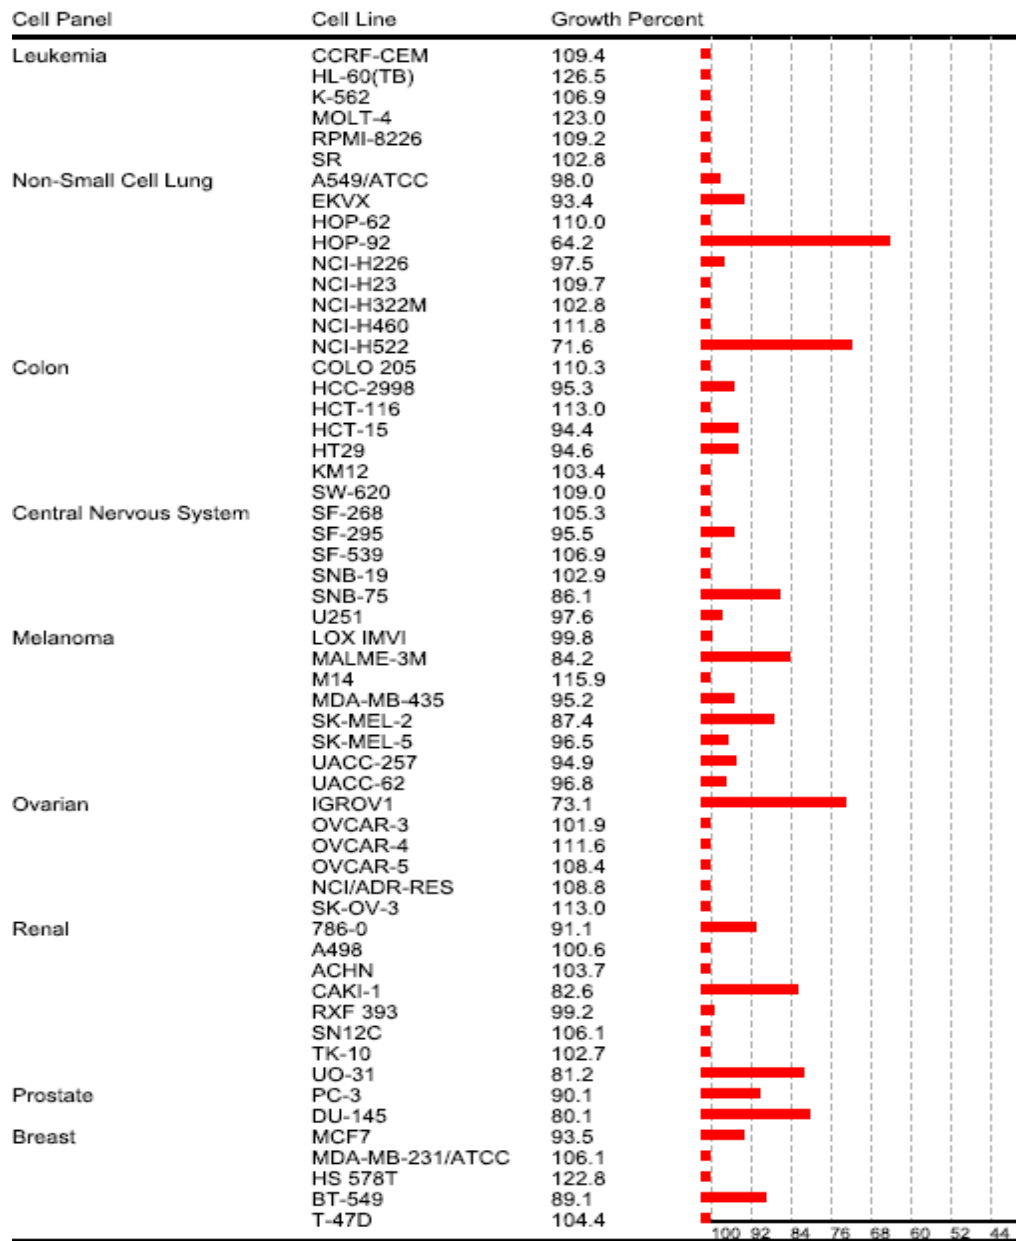

**Sup. Fig. 4** One-dose data in the National Cancer Institute anticancer screen showing a mean graph of the percent growth of cancer cells treated with of 10  $\mu$ M of **cisplatin** for 24 h. The number reported for the One-dose assay is growth relative to the no-drug control, and relative to the time zero number of cells. This allows detection of both growth inhibition (values between 0 and 100) and lethality (values less than 0). For example, a value of 100 means no growth inhibition. A value of 40 would mean 60% growth inhibition. A value of 0 means no net growth over the course of the experiment. A value of -40 would mean 40% lethality. A value of -100 means all cells are dead.

**Supplementary Table 1** Statistical analysis of the cell cycle analysis after cells treated with copper(II) complexes **1** - **4** at 24h. \* = ( $p < 0.05$ ), \*\* = ( $p < 0.01$ ), \*\*\* = ( $p < 0.005$ ) indicates significantly different from untreated. NS = non-significant.

|                       | MDA-MB-231 cells                        |         |                         | MCF10A cells                            |         |                         |
|-----------------------|-----------------------------------------|---------|-------------------------|-----------------------------------------|---------|-------------------------|
|                       | G <sub>0</sub> /G <sub>1</sub><br>phase | S phase | G <sub>2</sub> /M phase | G <sub>0</sub> /G <sub>1</sub><br>phase | S phase | G <sub>2</sub> /M phase |
| Untreated vs <b>1</b> | NS                                      | NS      | ***                     | NS                                      | NS      | NS                      |
| Untreated vs <b>2</b> | **                                      | *       | ***                     | NS                                      | **      | NS                      |
| Untreated vs <b>3</b> | NS                                      | NS      | ***                     | *                                       | ***     | NS                      |
| Untreated vs <b>4</b> | *                                       | NS      | ***                     | NS                                      | *       | NS                      |
